# Supplementary material for: Toxicity and multigenerational effects of bisphenol S exposure to Caenorhabditis elegans on developmental, biochemical, reproductive and oxidative stress
Source: Royal Society of Chemistry journal article supplement (doi:10.1039/c9tx00055k), 2019-06-02
Supplement: c9tx00055k1.pdf [file c9tx00055k1.pdf]

Table. S1 Effects of BPS on the movement behavior of *C. elegans* by acute exposures (mean±SEM)

| Concentration(μM) | Head thrashes(min) | Body bends(20sec) |
|-------------------|--------------------|-------------------|
| 0                 | 140.86±2.85        | 14.00±0.55        |
| 0.001             | 139.86±2.49        | 12.70±0.66        |
| 0.01              | 119.43±4.12        | 11.90±0.84        |
| 0.1               | 123.14±1.18        | 12.70±0.60        |
| 1                 | 117.43±2.46        | 11.50±0.63        |
| 10                | 117.86±3.43        | 11.80±0.66        |
| 100               | 116.29±2.56        | 11.20±0.37        |

Table. S2 Effect of BPS on body length, brood size and lifespan of *C. elegans* by acute exposures (mean±SEM)

| Concentration(μM) | Body length(μm) | Brood size   | Average lifespan(d) |
|-------------------|-----------------|--------------|---------------------|
| 0                 | 1157.30±27.56   | 263.67±11.78 | 19.30±0.82          |
| 0.001             | 1118.82±13.05   | 241.67±9.94  | 19.00±0.81          |
| 0.01              | 983.71±9.55     | 170.67±7.22  | 16.75±0.66          |
| 0.1               | 1007.20±12.79   | 143.67±7.62  | 16.80±0.66          |
| 1                 | 1026.63±4.79    | 149.33±2.85  | 15.70±0.67          |
| 10                | 982.61±6.55     | 152.67±8.74  | 15.00±0.64          |
| 100               | 980.55±10.97    | 144.00±4.73  | 14.50±0.55          |

Table. S3 Effects of BPS on the locomotion behavior of *C. elegans* by multi-generations acute exposures (mean±SEM)

| Concentrations (μM) | Generations | Head thrashes | Body bends (20sec) |
|---------------------|-------------|---------------|--------------------|
| 0                   | G1          | 140.86±2.85   | 14.00±0.55         |
|                     | G2          | 146.00±1.81   | 13.90±0.37         |
|                     | G3          | 144.43±2.42   | 13.60±0.70         |
|                     | G4          | 147.14±2.56   | 14.50±0.48         |
| 0.001               | G1          | 139.86±2.49   | 12.70±0.66         |
|                     | G2          | 136.71±3.46   | 13.80±0.37         |
|                     | G3          | 138.57±3.23   | 12.30±0.49         |
|                     | G4          | 143.00±2.42   | 12.92±0.78         |

|      |    |             |            |
|------|----|-------------|------------|
| 0.01 | G1 | 119.43±4.12 | 11.90±0.84 |
|      | G2 | 132.00±0.90 | 11.80±0.80 |
|      | G3 | 123.00±3.34 | 11.70±0.37 |
|      | G4 | 111.00±1.88 | 14.50±0.91 |
| 0.1  | G1 | 123.14±1.18 | 12.70±0.60 |
|      | G2 | 126.29±4.38 | 12.00±0.82 |
|      | G3 | 111.43±2.15 | 13.10±0.29 |
|      | G4 | 111.43±2.84 | 14.17±0.83 |
| 1    | G1 | 117.43±2.46 | 11.50±0.63 |
|      | G2 | 118.29±4.53 | 12.50±0.76 |
|      | G3 | 117.57±3.74 | 13.20±0.12 |
|      | G4 | 109.43±2.38 | 14.42±0.37 |
| 10   | G1 | 117.86±3.43 | 11.80±0.66 |
|      | G2 | 114.14±4.58 | 11.60±0.51 |
|      | G3 | 112.29±3.29 | 11.00±0.42 |
|      | G4 | 114.29±2.33 | 15.00±0.97 |
| 100  | G1 | 116.29±2.56 | 11.20±0.37 |
|      | G2 | 124.29±2.72 | 11.50±0.50 |
|      | G3 | 124.00±1.69 | 13.50±0.55 |
|      | G4 | 114.14±1.81 | 14.75±0.66 |

Table. S4 Effects of BPS on the body length and brood size of *C. elegans* by multi-generations acute exposures (mean±SEM)

| Concentrations (μM) | Generations | Body length (μm) | Brood size   |
|---------------------|-------------|------------------|--------------|
| 0                   | G1          | 1157.30±27.56    | 263.67±11.78 |
|                     | G2          | 1054.41±24.24    | 254.67±13.22 |
|                     | G3          | 1165.46±19.90    | 256.00±7.77  |
|                     | G4          | 1107.42±18.69    | 265.33±8.76  |
| 0.001               | G1          | 1118.82±13.05    | 241.67±9.94  |
|                     | G2          | 1044.56±15.60    | 228.67±7.51  |
|                     | G3          | 1100.46±10.87    | 238.00±6.66  |
|                     | G4          | 1080.77±21.20    | 247.00±2.89  |

|      |    |               |              |
|------|----|---------------|--------------|
| 0.01 | G1 | 983.71±9.55   | 170.67±7.22  |
|      | G2 | 959.80±8.06   | 155.00±12.66 |
|      | G3 | 983.99±18.05  | 213.67±5.04  |
|      | G4 | 1071.31±18.37 | 161.00±9.29  |
| 0.1  | G1 | 1007.20±12.79 | 143.67±7.62  |
|      | G2 | 955.31±6.90   | 198.67±7.80  |
|      | G3 | 1033.99±18.05 | 129.00±5.29  |
|      | G4 | 930.49±11.80  | 175.00±11.02 |
| 1    | G1 | 1026.63±4.79  | 149.33±2.85  |
|      | G2 | 876.82±16.55  | 177.33±5.36  |
|      | G3 | 960.38±15.54  | 126.00±6.08  |
|      | G4 | 944.77±24.75  | 187.00±7.57  |
| 10   | G1 | 982.61±6.55   | 152.67±8.74  |
|      | G2 | 898.96±11.12  | 166.67±9.02  |
|      | G3 | 935.28±20.12  | 126.67±7.22  |
|      | G4 | 1011.82±24.63 | 172.67±1.86  |
| 100  | G1 | 980.55±10.97  | 144.00±4.73  |
|      | G2 | 864.32±12.84  | 115.33±7.75  |
|      | G3 | 1008.11±21.99 | 129.00±4.51  |
|      | G4 | 1021.84±13.90 | 129.67±5.21  |
